# Supplementary material
Source: HighWire-hosted journal article supplement (http://cmaj.ca/highwire/filestream/149545/field_highwire_adjunct_files/0/221647-guide-1-at.pdf)
Supplement: 221647-guide-1-at.pdf [file 221647-guide-1-at.pdf]

**Table 1.** Exercise practice key points and definitions (1-10)

Encourage a variety of types and intensities of physical activity as in the Canadian 24-Hour Movement Guidelines (<https://csepguidelines.ca>) but **prioritize balance, functional, and resistance training  $\geq$  twice weekly.**

↑ **exercise difficulty, pace, frequency, volume (sets, reps) or resistance over time.**

For patients who wish to participate in **impact exercise**:

- only progress to moderate (e.g., running, racquet sports, skipping) or high (e.g., drop or high vertical jumps) impact exercise if appropriate for fracture risk or physical fitness level;
- safety or efficacy is uncertain in individuals at high fracture risk (*history of spine fracture or 10-year fracture risk for major osteoporotic fracture of  $\geq 20\%$  calculated by FRAX or Canadian Association of Radiologists and Osteoporosis Canada tools*).

Movements that involve **rapid, repetitive, sustained, weighted, or end range of motion twisting or flexion of the spine** may need to be modified, especially in individuals with a history of spine fracture, or very low spine BMD.

**Definitions**

**What are balance exercises?**

Exercises that challenge aspects of balance, such as:

- Shifting body weight to the limits of stability;
- Reacting to things that upset your balance (e.g., catching and throwing a ball);
- Maintaining balance while moving (e.g., Tai chi, heel raises, agility training);
- Reducing base of support (e.g., standing on one foot).

**What are functional exercises?**

Exercises that improve ability to perform everyday tasks, or do activities for fun or fitness (e.g., chair stands for sit-to-stand ability, stair-climbing to train for hiking).

**What is resistance training (or strength training, muscle strengthening exercises)?**

Exercises where major muscle groups (e.g., upper and lower extremities, chest, shoulders, back) work against resistance (e.g., squats, lunges, and push-ups). Increase volume (e.g., sets, reps, weight), frequency, or difficulty to achieve **progressive overload**. Many resistance training exercises would be considered functional exercises.

**Table 2.** Nutrition key points (18, 19)

**Recommended dietary allowances (RDA)**

- Calcium\*:
    - Men
      - 51-70 years: 1000 mg calcium/day
      - >70 years: 1200 mg calcium/day
    - Women
      - >50 years: 1200 mg calcium/day
  - Vitamin D:
    - Men and Women
      - ≤70 years: 600 IU vitamin D/day
      - >70 years: 800 IU vitamin D/day
- To meet the RDA, Health Canada recommends a supplement of 400 IU/day\*\****
- Protein:
    - Men and Women
      - >50 years: 0.8 g protein/kg body weight/day

**Examples of common dietary sources**

- Calcium-rich foods:
  - milk products (milk, yogurt, cheese)
  - fortified beverages (plant-based, orange juice)
  - canned salmon (with bones)
- Vitamin D-rich foods:
  - fatty fish (salmon, rainbow trout)
  - fortified foods (cow's milk, plant-based beverages)
  - eggs
- Protein-rich foods:
  - beef, pork, chicken, fish, eggs, milk products
  - legumes, beans, nuts, seeds
- **See Nutrition Resources and Tools on the OC website for additional information**  
(<https://osteoporosis.ca/nutrition/>)
- **Consult with a registered dietitian when a nutritional assessment may be warranted.**

\*Calcium refers to elemental calcium

\*\*Health Canada 2022. <https://food-guide.canada.ca/en/applying-guidelines/advice-vitamin-mineral-supplementation/#vitamin-d>

**Table 3.** Biochemical testing for secondary causes of osteoporosis, and for potential limitations when considering specific osteoporosis pharmacotherapy (17)

- Calcium, corrected for albumin
- Phosphate
- Creatinine (eGFR)
- Alkaline phosphatase
- Thyroid-stimulating hormone
- Serum protein electrophoresis (for patients with vertebral fractures)
- 25-hydroxyvitamin D, if risk factors for insufficiency or starting potent antiresorptive therapy

**Table 4.** Risk factors for vitamin D insufficiency/deficiency\* (11-16)

- Malabsorption syndromes (e.g. inflammatory bowel disease, celiac disease, bariatric surgery, gastrectomy)
- Reduced skin synthesis (e.g. limited sun exposure, increased skin pigmentation)
- Liver failure/cirrhosis
- Nephrotic syndrome
- Chronic kidney disease/renal failure
- Medication affecting vitamin D metabolism (e.g. anticonvulsants, glucocorticoids, antiretroviral agents)
- Parathyroid disorders (e.g. hypoparathyroidism, hyperparathyroidism)

\*Vitamin D sufficiency is estimated by measuring serum 25-hydroxyvitamin D (25OHD).

The optimal serum 25-hydroxyvitamin level for bone health is uncertain, however the following definitions are widely accepted (18):

- <30 nmol/L - high risk of vitamin D deficiency
- 30 to <50 nmol/L - potential risk of inadequacy for bone health
- ≥50 nmol/L - generally considered adequate for bone and overall health in healthy individuals
- >125 nmol/L - linked to potential adverse effects

| <b>Table 5. Causes of secondary osteoporosis or that have adverse effect on bone health (15, 20-27)</b>                                                                                                                                    |                                                                                                                                                                        |                                                                                                                                                                                                                                                                                                                                                           |
|--------------------------------------------------------------------------------------------------------------------------------------------------------------------------------------------------------------------------------------------|------------------------------------------------------------------------------------------------------------------------------------------------------------------------|-----------------------------------------------------------------------------------------------------------------------------------------------------------------------------------------------------------------------------------------------------------------------------------------------------------------------------------------------------------|
| <b>Drugs</b>                                                                                                                                                                                                                               | <b>Endocrine disorders</b>                                                                                                                                             | <b>Gastrointestinal &amp; Nutritional disorders</b>                                                                                                                                                                                                                                                                                                       |
| Glucocorticoid steroids<br>Aromatase inhibitors<br>Anticonvulsants (particularly phenytoin, phenobarbital)<br>GnRH agonists and antagonists<br>Androgen-deprivation agents<br>Cancer chemotherapy<br>Immunosuppressants (eg. cyclosporine) | Hyperparathyroidism<br>Hyperthyroidism<br>Hypercortisolism/Cushing’s syndrome<br>Diabetes mellitus (Type 1 & Type 2)<br>Prolonged premature hypogonadism<br>Acromegaly | Inflammatory bowel disease<br>Celiac disease<br>Bariatric surgery<br>Pancreatic insufficiency<br>Other malabsorptive syndromes<br>Primary biliary cholangitis<br>Chronic liver disease<br>Eating disorder<br>Malnutrition<br>Parenteral nutrition<br>Vitamin D and/or calcium deficiency                                                                  |
| <b>Rheumatologic disorders</b>                                                                                                                                                                                                             | <b>Genetic disorders</b>                                                                                                                                               | <b>Other disorders</b>                                                                                                                                                                                                                                                                                                                                    |
| Rheumatoid arthritis<br>Other inflammatory arthritis disorders<br>Systemic lupus erythematosus                                                                                                                                             | Osteogenesis imperfecta<br>Hypophosphatasia<br>Other genetic causes of osteomalacia                                                                                    | Multiple myeloma<br>Other marrow-related disorders<br>Idiopathic hypercalciuria<br>Chronic kidney disease/renal failure<br>Chronic obstructive pulmonary disease<br>Organ transplantation<br>Multiple sclerosis<br>Parkinson’s disease<br>Other neuromuscular disorders<br>Prolonged immobilization<br>Paget’s disease<br>Acquired causes of osteomalacia |

| <b>Table 6.</b> Clinical assessment to identify who to send for imaging to rule out vertebral fractures (28-31) |                                                                |
|-----------------------------------------------------------------------------------------------------------------|----------------------------------------------------------------|
| <b>Measure</b>                                                                                                  | <b>Cut off value to recommend spine imaging</b>                |
| Measure height                                                                                                  | Historical height loss > 6 cm<br>Prospective height loss > 2cm |
| Measure rib to pelvic distance                                                                                  | ≤ 2 fingerbreadths                                             |
| Measure occiput to wall distance                                                                                | >5 cm                                                          |

## References

1. Ponzano M, Rodrigues IB, Hosseini Z, Ashe MC, Butt DA, Chilibeck PD, et al. Progressive Resistance Training for Improving Health-Related Outcomes in People at Risk of Fracture: A Systematic Review and Meta-Analysis of Randomized Controlled Trials. *Phys Ther.* 2021;101(2).
2. Ponzano M, Tibert N, Bansal S, Katzman W, Giangregorio L. Exercise for improving age-related hyperkyphosis: a systematic review and meta-analysis with GRADE assessment. *Arch Osteoporos.* 2021;16(1):140.
3. Rodrigues IB, Ponzano M, Butt DA, Bartley J, Bardai Z, Ashe MC, et al. The Effects of Walking or Nordic Walking in Adults 50 Years and Older at Elevated Risk of Fractures: A Systematic Review and Meta-Analysis. *J Aging Phys Act.* 2021;29(5):886-99.
4. Kim KV, Bartley J, Ashe MC, Bardai Z, Butt D, Chilibeck PD, et al. Effect of Yoga on Health-Related Outcomes in People at Risk of Fractures: A Systematic Review. *Appl Physiol Nutr Metab.* 2021.
5. Rodrigues IB, Ponzano M, Hosseini Z, Thabane L, Chilibeck PD, Butt DA, et al. The Effect of Impact Exercise (Alone or Multicomponent Intervention) on Health-Related Outcomes in Individuals at Risk of Fractures: A Systematic Review and Meta-Analysis of Randomized Controlled Trials. *Sports Med.* 2021;51(6):1273-92.
6. Ashe MC, Santos IKD, Edward NY, Burnett LA, Barnes R, Fleig L, et al. Physical Activity and Bone Health in Men: A Systematic Review and Meta-Analysis. *J Bone Metab.* 2021;28(1):27-39.
7. Gibbs JC, MacIntyre NJ, Ponzano M, Templeton JA, Thabane L, Papaioannou A, et al. Exercise for improving outcomes after osteoporotic vertebral fracture. *The Cochrane database of systematic reviews.* 2019;7(7):Cd008618.
8. McLaughlin EC, El-Kotob R, Chaput JP, Janssen I, Kho ME, Poitras VJ, et al. Balance and functional training and health in adults: an overview of systematic reviews. *Appl Physiol Nutr Metab.* 2020;45(10 (Suppl. 2)):S180-s96.
9. McLaughlin E, Bartley J, Ashe M, Butt D, Chilibeck P, Wark J, et al. The Effects of Pilates on Health-related Outcomes in Individuals at Risk of Fracture: A Systematic Review. *Applied Physiology, Nutrition, and Metabolism.* 2022;in press.
10. Giangregorio LM, McGill S, Wark JD, Laprade J, Heinonen A, Ashe MC, et al. Too Fit To Fracture: outcomes of a Delphi consensus process on physical activity and exercise recommendations for adults with osteoporosis with or without vertebral fractures. *Osteoporos Int.* 2015;26(3):891-910.
11. Holick MF. Vitamin D deficiency. *NEnglJMed.* 2007;357(1533-4406 (Electronic)):266-81.

## Appendix 1 2023 Guideline Supplementary Tables

12. Holick MF, Binkley NC, Bischoff-Ferrari HA, Gordon CM, Hanley DA, Heaney RP, et al. Evaluation, treatment, and prevention of vitamin D deficiency: an Endocrine Society clinical practice guideline. *J Clin Endocrinol Metab.* 2011;96(7):1911-30.
13. Pludowski P, Takacs I, Boyanov M, Belaya Z, Diaconu CC, Mokhort T, et al. Clinical Practice in the Prevention, Diagnosis and Treatment of Vitamin D Deficiency: A Central and Eastern European Expert Consensus Statement. *Nutrients.* 2022;14(7).
14. Passeron T, Bouillon R, Callender V, Cestari T, Diepgen TL, Green AC, et al. Sunscreen photoprotection and vitamin D status. *Br J Dermatol.* 2019;181(5):916-31.
15. Khan AA, Hanley DA, Rizzoli R, Bollerslev J, Young JE, Rejnmark L, et al. Primary hyperparathyroidism: review and recommendations on evaluation, diagnosis, and management. A Canadian and international consensus. *Osteoporos Int.* 2017;28(1):1-19.
16. Grey A, Lucas J, Horne A, Gamble G, Davidson JS, Reid IR. Vitamin D repletion in patients with primary hyperparathyroidism and coexistent vitamin D insufficiency. *J Clin Endocrinol Metab.* 2005;90(4):2122-6.
17. Papaioannou A, Morin S, Cheung AM, Atkinson S, Brown JP, Feldman S, et al. 2010 clinical practice guidelines for the diagnosis and management of osteoporosis in Canada: summary. *Canadian Medical Association Journal.* 2010;182(17):1864-73.
18. Institute of Medicine. Dietary Reference Intakes for Calcium and Vitamin D. In: Ross CA, editor. National Academy Press: The National Academics Press; 2011.
19. Institute of Medicine. Dietary Reference Intakes for Energy, Carbohydrate, Fiber, Fat, Fatty Acids, Cholesterol, Protein, and Amino Acids. Washington: Institute of Medicine; 2005 2005.
20. Office of the Surgeon General (US). Bone Health and Osteoporosis: a report of the Surgeon General. Rockville; 2004.
21. Bandeira L, Silva BC, Bilezikian JP. Male osteoporosis. *Arch Endocrinol Metab.* 2022;66(5):739-47.
22. Buckley L, Guyatt G, Fink HA, Cannon M, Grossman J, Hansen KE, et al. 2017 American College of Rheumatology Guideline for the Prevention and Treatment of Glucocorticoid-Induced Osteoporosis. *Arthritis Care Res (Hoboken).* 2017;69(8):1095-110.
23. Ferrari SL, Abrahamsen B, Napoli N, Akesson K, Chandran M, Eastell R, et al. Diagnosis and management of bone fragility in diabetes: an emerging challenge. *Osteoporos Int.* 2018;29(12):2585-96.
24. Hadji P, Body JJ, Aapro MS, Brufsky A, Coleman RE, Guise T, et al. Practical guidance for the management of aromatase inhibitor-associated bone loss. *Annals of Oncology.* 2008;19(8):1407-16.
25. Kidney Disease: Improving Global Outcomes. KDIGO 2017 Clinical Practice Guideline Update for the Diagnosis, Evaluation, Prevention, and Treatment of Chronic Kidney Disease-Mineral and Bone Disorder (CKD-MBD). *Kidney Int Suppl (2011).* 2017;7(1):1-59.
26. Liu W, Lee B, Nagamani SCS, Nicol L, Rauch F, Rush ET, et al. Approach to the Patient: Pharmacological therapies for fracture risk reduction in adults with osteogenesis imperfecta. *J Clin Endocrinol Metab.* 2023.
27. Shapiro CL, Van Poznak C, Lacchetti C, Kirshner J, Eastell R, Gagel R, et al. Management of Osteoporosis in Survivors of Adult Cancers With Nonmetastatic Disease: ASCO Clinical Practice Guideline. *J Clin Oncol.* 2019;37(31):2916-46.
28. Siminoski K, Jiang G, Adachi JD, Hanley DA, Cline G, Ioannidis G, et al. Accuracy of height loss during prospective monitoring for detection of incident vertebral fractures. *OsteoporosInt.* 2005;16(0937-941X (Print)):403-10.
29. Siminoski K, Warshawski RS, Jen H, Lee K. The accuracy of historical height loss for the detection of vertebral fractures in postmenopausal women. *OsteoporosInt.* 2006;17(0937-941X (Print)):290-6.

## Appendix 1 2023 Guideline Supplementary Tables

30. Green AD, Colon-Emeric CS, Bastian L, Drake MT, Lyles KW. Does this woman have osteoporosis? *JAMA*. 2004;292(1538-3598 (Electronic)):2890-900.
31. Siminoski K, Warshawski RS, Jen H, Lee KC. The accuracy of clinical kyphosis examination for detection of thoracic vertebral fractures: comparison of direct and indirect kyphosis measures. *J Musculoskelet Neuronal Interact*. 2011;11(3):249-56.
